# Supplementary material for: Dielectric control of porous polydimethylsiloxane elastomers with Au nanoparticles for enhancing the output performance of triboelectric nanogenerators
Source: Royal Society of Chemistry journal article supplement (doi:10.1039/d0ra03522j), 2020-01-01
Supplement: d0ra03522j1.pdf [file d0ra03522j1.pdf]

## Supporting Information

# Dielectric Control of Porous Polydimethylsiloxane Elastomers with Au Nanoparticles for Enhancing the Output Performance of Triboelectric Nanogenerators

Merreta Noorenza Biutty<sup>a</sup>, Ja Min Koo<sup>a</sup>, Maulida Zakia<sup>a</sup>, Puji Lestari Handayani<sup>a</sup>, U-Hyeok Choi<sup>b</sup>, and  
Seong Il Yoo<sup>a\*</sup>

<sup>a</sup>Department of Polymer Engineering, Pukyong National University, Busan 48547, Korea  
Email: [siyoo@pknu.ac.kr](mailto:siyoo@pknu.ac.kr); Tel: +82-51-629-6456

<sup>b</sup>Department of Polymer Science and Engineering, Inha University, Incheon 22212, Korea

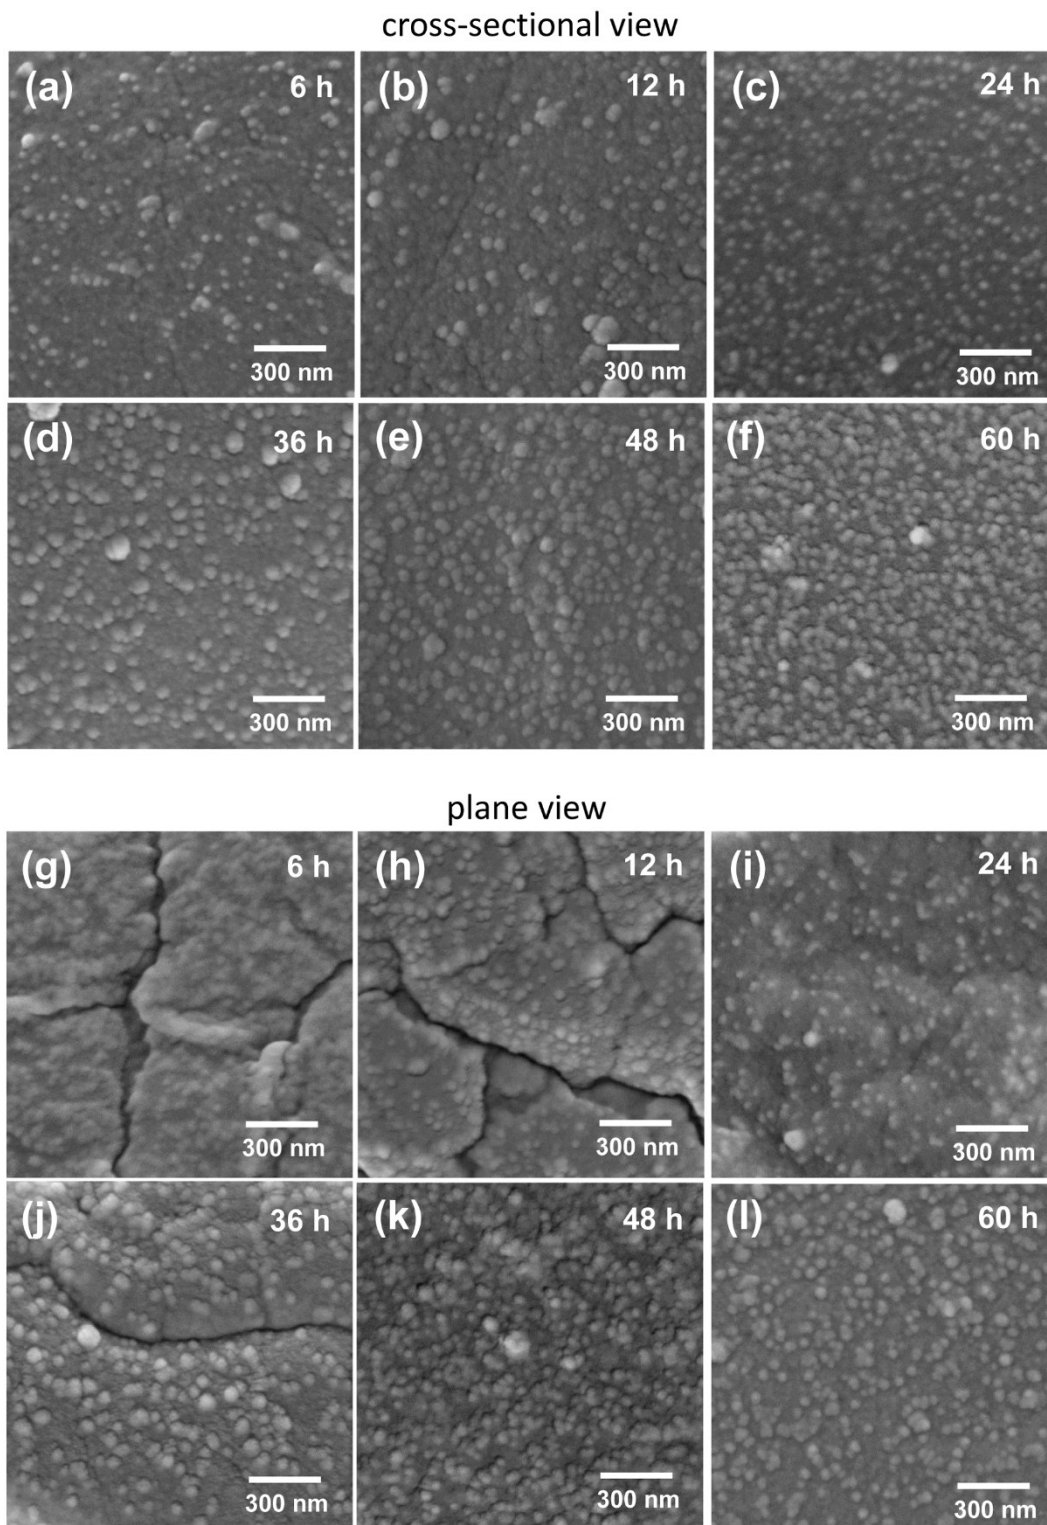

**Figure S1.** (a - f) Cross-sectional and (g - l) plane view FE-SEM images of composites PDMS/PDA/Au sponges under different immersion time.

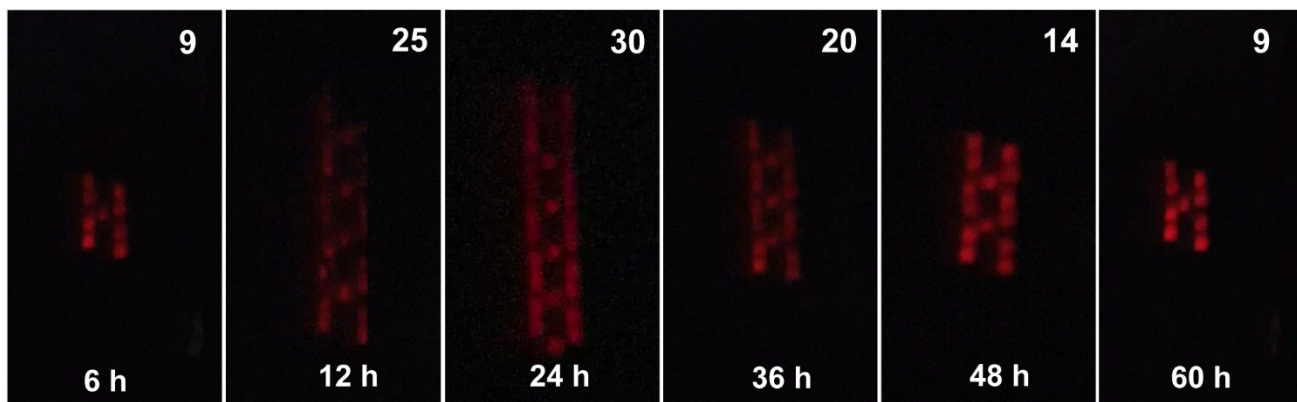

**Figure S2.** Photos of LEDs lit by TENG devices with composites PDMS/PDA/Au sponges under different immersion time. The number on the upper right side corresponds to the lighted LEDs.
